# Supplementary material for: Approaching the Sabatier optimum via a triple-defect synergistic strategy for enhanced oxygen evolution reaction
Source: Royal Society of Chemistry journal article supplement (doi:10.1039/d5mh01997d), 2025-11-28
Supplement: d5mh01997d1.pdf [file d5mh01997d1.pdf]

## **Supplementary Information**

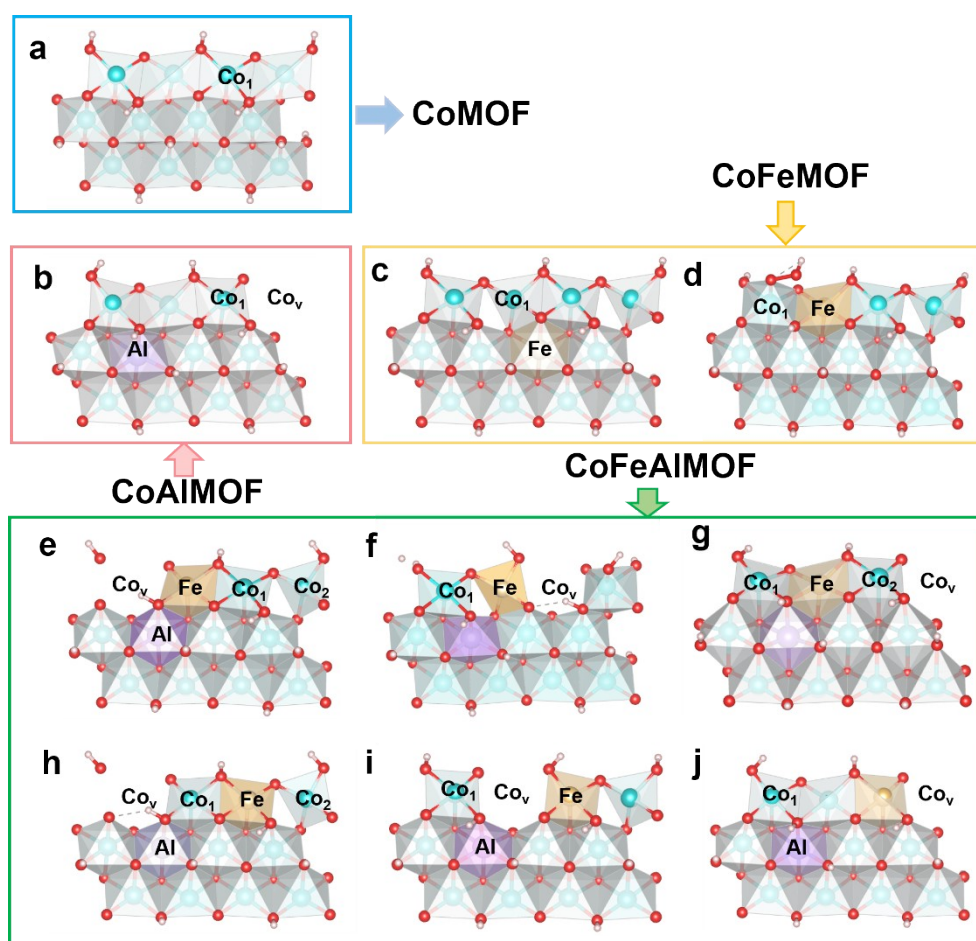

Figure S1. Potential active sites on (01-12) facets considered by Hubbard-corrected density functional theory calculations. a) Co<sub>1</sub> site in CoMOF. b) Co<sub>1</sub> site in CoAIMOF. c) Co<sub>1</sub> sites in CoFeMOF. d) Co<sub>1</sub> and Fe sites in CoFeMOF. e-j) Co<sub>1</sub> and Co<sub>2</sub> sites in CoFeAIMOF

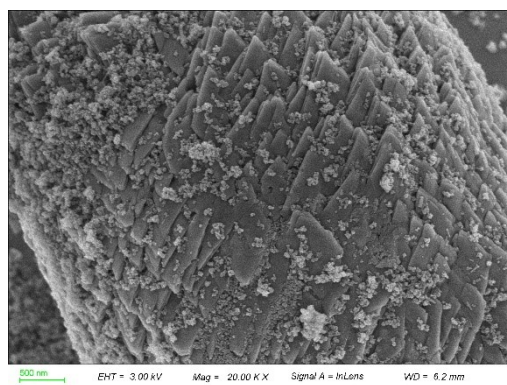

Figure S2. SEM image of CoFeAlMOF.

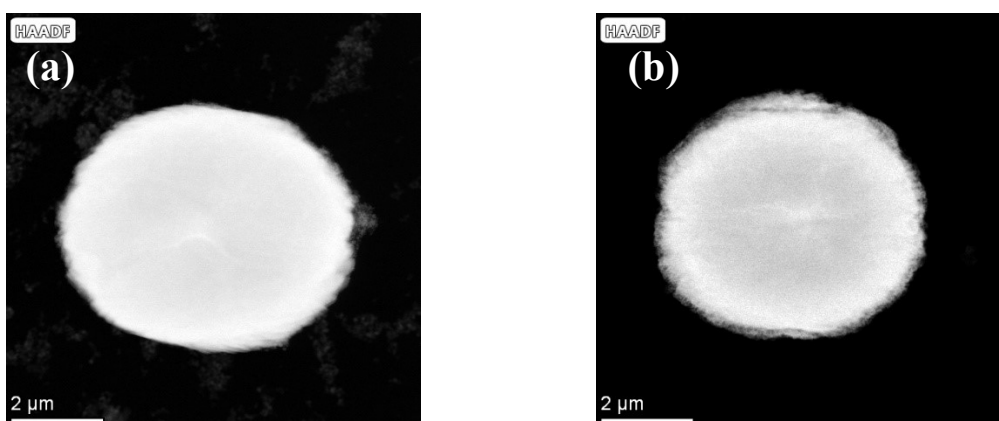

Figure S3. HAADF-STEM image of (a) CoFeAlMOF (b) CoV-CoFeAlMOF.

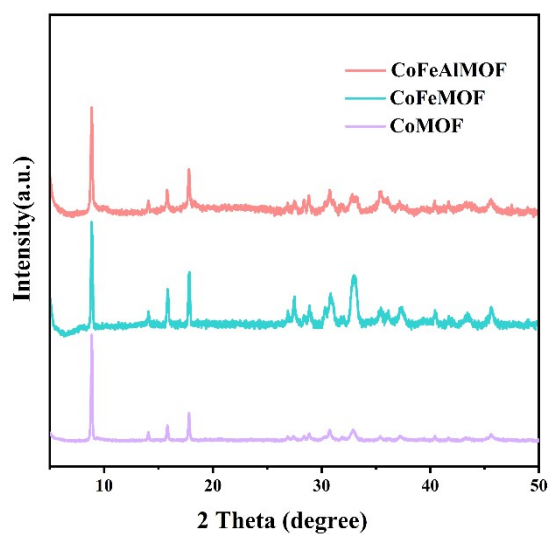

Figure S4. XRD patterns of CoFeAlMOF, CoFeMOF, CoMOF.

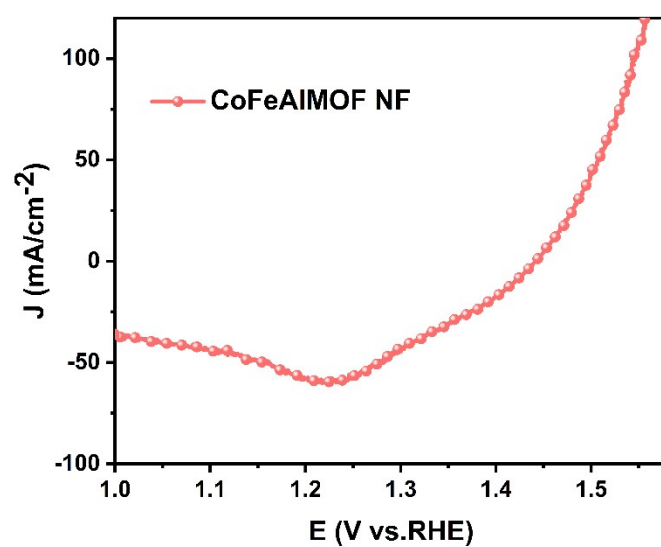

Figure S5. LSV curves with 90% iR-compensation grown on nickel foam substrates (requiring only 229 mV overpotential to achieve 10 mA cm<sup>-2</sup> for OER)

## Supplementary Information Tables

**Supplementary Table 1. Calculated energetics and overpotentials of different metal sites.**

|                                 | Gibbs free energies (eV) |                         |                           | Gibbs free energy changes (eV) |              |              |              | $\eta^{\text{OER}}$ |
|---------------------------------|--------------------------|-------------------------|---------------------------|--------------------------------|--------------|--------------|--------------|---------------------|
|                                 | $\Delta G_{\text{OH}^*}$ | $\Delta G_{\text{O}^*}$ | $\Delta G_{\text{OOH}^*}$ | $\Delta G_1$                   | $\Delta G_2$ | $\Delta G_3$ | $\Delta G_4$ | (mV)                |
| <b>CoMOF-Co<sub>1</sub></b>     | 0.62                     | 2.36                    | 3.92                      | 0.62                           | 1.74         | 1.56         | 1.00         | 0.51                |
| <b>CoAlMOF-Co<sub>1</sub></b>   | 1.18                     | 2.75                    | 4.16                      | 1.18                           | 1.57         | 1.41         | 0.76         | 0.34                |
| <b>CoFeMOF-Co<sub>1</sub></b>   | 0.96                     | 2.74                    | 3.86                      | 0.96                           | 1.78         | 1.12         | 1.06         | 0.55                |
| <b>CoFeMOF-Co<sub>1</sub></b>   | 0.93                     | 2.57                    | 3.99                      | 0.93                           | 1.64         | 1.42         | 0.93         | 0.41                |
| <b>CoFeAlMOF-Co<sub>1</sub></b> | 0.84                     | 2.37                    | 3.99                      | 0.84                           | 1.53         | 1.62         | 0.93         | 0.39                |
| <b>CoFeAlMOF-Co<sub>2</sub></b> | 0.89                     | 2.54                    | 4.08                      | 0.89                           | 1.65         | 1.54         | 0.84         | 0.42                |
| <b>CoFeAlMOF-Co<sub>1</sub></b> | 1.23                     | 2.68                    | 4.03                      | 1.23                           | 1.45         | 1.35         | 0.89         | 0.22                |
| <b>CoFeAlMOF-Co<sub>1</sub></b> | 0.84                     | 2.63                    | 3.88                      | 0.84                           | 1.79         | 1.25         | 1.04         | 0.56                |
| <b>CoFeAlMOF-Co<sub>2</sub></b> | 1.42                     | 2.85                    | 4.28                      | 1.42                           | 1.43         | 1.43         | 0.64         | 0.2                 |
| <b>CoFeAlMOF-Co<sub>1</sub></b> | 1.33                     | 2.88                    | 4.15                      | 1.33                           | 1.55         | 1.27         | 0.77         | 0.32                |
| <b>CoFeAlMOF-Co<sub>2</sub></b> | 0.96                     | 2.63                    | 3.85                      | 0.96                           | 1.67         | 1.22         | 1.07         | 0.44                |
| <b>CoFeAlMOF-Co<sub>1</sub></b> | 1.05                     | 2.67                    | 3.76                      | 1.05                           | 1.62         | 1.09         | 1.16         | 0.39                |
| <b>CoFeAlMOF-Co<sub>1</sub></b> | 0.91                     | 2.65                    | 4.03                      | 0.91                           | 1.74         | 1.38         | 0.89         | 0.51                |

**Supplementary Table 2. Bader Charge of CoMOF, CoFeMOF , CoAlMOF and Co<sub>v</sub>-CoFeAlMOF.**

|           | <b>d-band centre</b> | <b>Bader Charge</b> |
|-----------|----------------------|---------------------|
| CoMOF     | -1.54 eV             | -1.26  e            |
| CoFeMOF   | -1.55 eV             | -1.28  e            |
| CoAlMOF   | -2.10 eV             | -1.30  e            |
| CoFeAlMOF | -2.21 eV             | -1.35  e            |

**Supplementary Table 3. The atomic ratio of CoFeAlMOF, detected by ICP-OES.**

| Element          | Co   | Fe   | Al   |
|------------------|------|------|------|
| Atomic ratio (%) | 48.4 | 25.8 | 25.8 |

**Supplementary Table 4. The ratio of Al in CoFeAlMOF before and after etching.**

| <b>Condition</b> | <b>Weight Percentage (W%) of Al</b> |
|------------------|-------------------------------------|
| Before Etching   | 4.79                                |
| After Etching    | 2.97                                |
